# Supplementary material for: Catalytic dehydrogenation of isobutane over a Ga2O3/ZnO interface: reaction routes and mechanism
Source: Royal Society of Chemistry journal article supplement (doi:10.1039/c5cy01950h), 2015-12-03
Supplement: c5cy01950h1.pdf [file c5cy01950h1.pdf]

## Supporting Information

### **Catalytic Dehydrogenation of Isobutane over Ga<sub>2</sub>O<sub>3</sub>/ZnO Interface: Reaction Routes and Mechanism**

*By*

Guowei Wang, Chunyi Li,\* and Honghong Shan

*State Key Laboratory of Heavy Oil Processing, China University of Petroleum, Qingdao 266580, PR China*

\*Corresponding author: Chunyi Li

State Key Laboratory of Heavy Oil Processing

China University of Petroleum

Qingdao 266580, PR China

Tel.: +86 532 86981862

E-mail address: chyli@upc.edu.cn, chyli\_upc@126.com (C. Li)

## List of contents:

**Figure S1.** Pore size distributions of (a) ZnO and (b) Ga<sub>2</sub>O<sub>3</sub>.

**Figure S2.** Dehydrogenation performance of isobutane over 5ZnO-Ga<sub>2</sub>O<sub>3</sub> catalyst with TOS under the reaction conditions of 560 °C, 4 mL catalyst loading, and 210 h<sup>-1</sup> gas space velocity.

**Figure S3.** Cvetanovic curves obtained by isobutane TPD experiments over different samples: (a) Ga<sub>2</sub>O<sub>3</sub>; (b) ZnO; (c) 5ZnO-Ga<sub>2</sub>O<sub>3</sub>.

**Figure S4.** Pyridine IR spectra of Ga<sub>2</sub>O<sub>3</sub> and ZnO samples.

**Table S1.** Dehydrogenation performance of different catalysts.

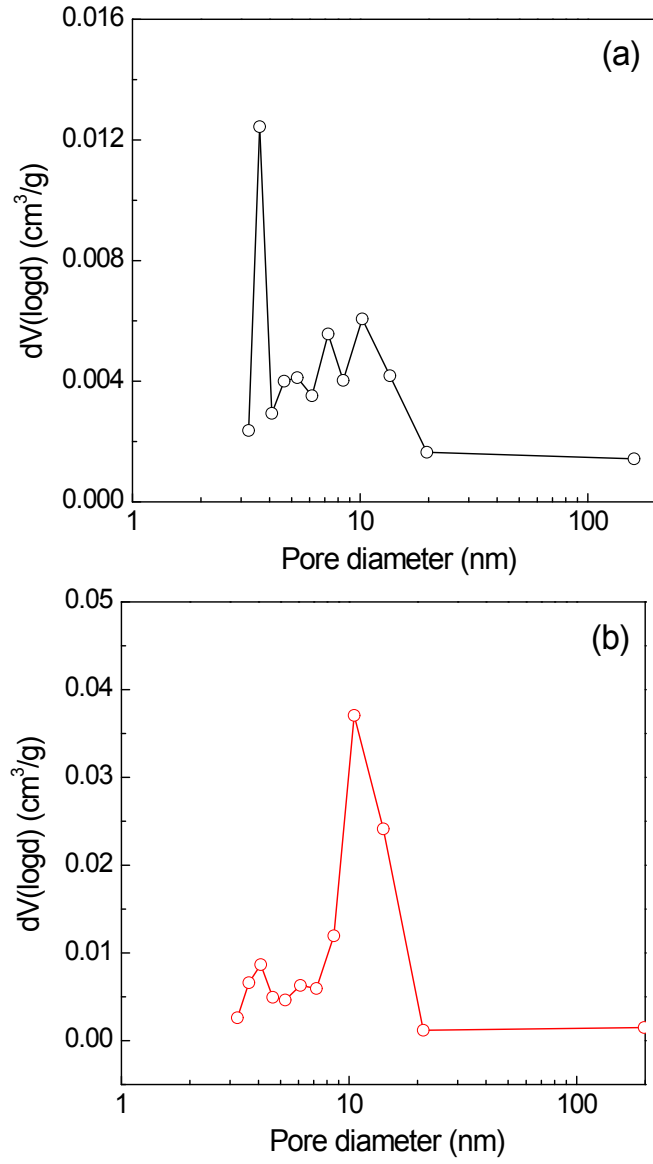

**Figure S1.** Pore size distributions of (a) ZnO and (b)  $\text{Ga}_2\text{O}_3$ .

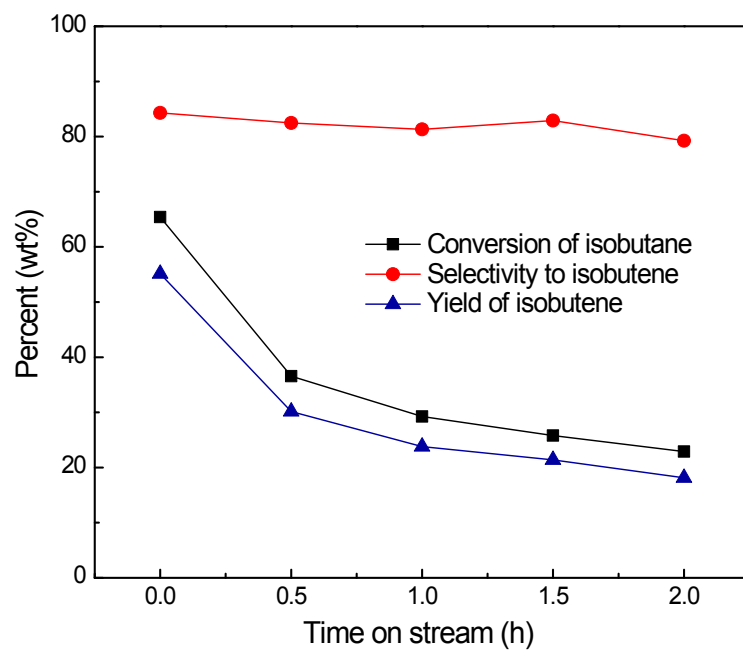

**Figure S2.** Dehydrogenation performance of isobutane over 5ZnO-Ga<sub>2</sub>O<sub>3</sub> catalyst with TOS under the reaction conditions of 560 °C, 4 mL catalyst loading, and 210 h<sup>-1</sup> gas space velocity.

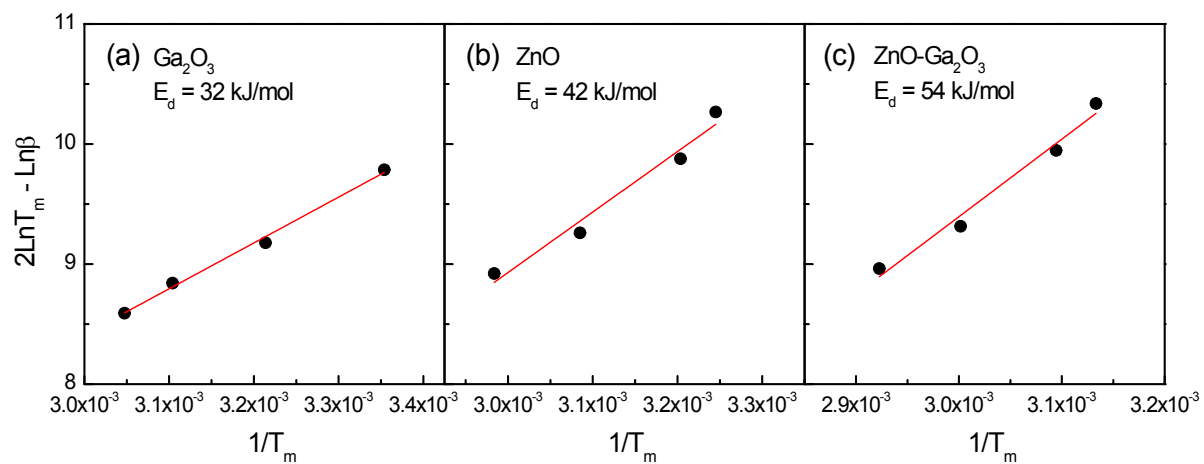

**Figure S3.** Cvetanovic curves obtained by isobutane TPD experiments over different samples: (a)  $\text{Ga}_2\text{O}_3$ ; (b)  $\text{ZnO}$ ; (c)  $5\text{ZnO-Ga}_2\text{O}_3$ .

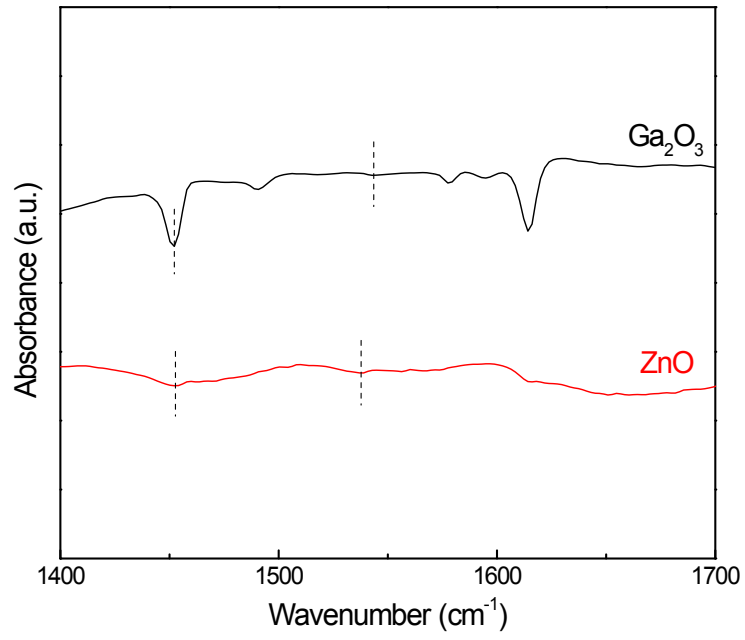

**Figure S4.** Pyridine IR spectra of  $\text{Ga}_2\text{O}_3$  and  $\text{ZnO}$  samples.

**Table S1.** Dehydrogenation performance of different catalysts<sup>a</sup>

| Sample                                                            | Isobutane conversion,<br>wt% | Isobutene selectivity,<br>wt% | Isobutene yield,<br>wt% |
|-------------------------------------------------------------------|------------------------------|-------------------------------|-------------------------|
| (a) 5ZnO-Ga <sub>2</sub> O <sub>3</sub> (20-60 mesh) <sup>b</sup> | 46.4                         | 76.2                          | 35.4                    |
| (b) 5ZnO-Ga <sub>2</sub> O <sub>3</sub> (20-60 mesh) <sup>c</sup> | 62.4                         | 84.7                          | 52.9                    |
| 5ZnO-Al <sub>2</sub> O <sub>3</sub>                               | 50.1                         | 84.4                          | 42.3                    |

<sup>a</sup> Reaction conditions: 560 °C, 4 mL catalyst loading, and 210 h<sup>-1</sup> gas space velocity.

<sup>b</sup> Sample (a) was fabricated by separately pressing and grinding ZnO and Ga<sub>2</sub>O<sub>3</sub> into 20-60 mesh particles, and then mixing together.

<sup>c</sup> Sample (b) was fabricated by mixing ZnO and Ga<sub>2</sub>O<sub>3</sub> together firstly, and then pressing and grinding the mixture into 20-60 mesh particles.
